# Supplementary material
Source: PubMed Central journal article supplement (PMC3295305)
Supplement: 1121040109_pnas.1121040109_SI.pdf [file 1121040109_pnas.1121040109_SI.pdf]

# Supporting Information

Gao et al. 10.1073/pnas.1121040109

## SI Materials and Methods

**Protein Purification.** Membranes from *Aquifex aeolicus* were solubilized and the solubilized proteins fractionated as described previously (1). The supercomplex was then isolated on a TSK 4000 (Tosoh) gel filtration column with buffer containing 20 mM Tris-HCl (pH 7.4), 150 mM NaCl, and 0.05% n-dodecyl- $\beta$ -D-maltoside (DDM). Cox2 was purified using a Superdex 200 (GE Healthcare) gel filtration column after the supercomplex was shifted from 0.05% (wt/vol) DDM to 0.8% (wt/vol)  $\beta$ -D-octylglucoside (OG). The composition of Cox2 and of the supercomplex was determined by MALDI-MS and laser-induced liquid beam ion desorption mass spectroscopy (LILBID-MS).

**MALDI-MS.** MALDI-MS was used for subunit identification. The tryptic in-gel digests with reduction and alkylation of cysteines were essentially performed according to Shevchenko et al. (2). As previously described (3), MS was done using a MALDI tandem TOF instrument (Ultraflex TOF/TOF; Bruker Daltonics) and spectra analyzed using Flex Analysis v2.4 (Bruker Daltonics). If necessary, tandem MS (MS/MS) spectra were acquired on a 4800 MALDI TOF/TOF Analyzer (Applied Biosystems). Fragment ions of angiotensin were used for the calibration of MS/MS spectra achieving a precursor mass accuracy of 50 ppm and a fragment ion accuracy of 0.3 Da. MS and MS/MS data were searched against an *Aquifex* database from the National Center for Biotechnology Information (NCBI) using the Mascot database search engine v2.2 [Matrix Science Ltd. (4)]. The following search settings were applied for peptide mass fingerprint (PMF) and MS/MS ion search, respectively: enzyme, trypsin; miss cleavage sites, two; fixed modification, carbamidomethyl; variable modification, methionine oxidation; mass accuracy, 100 ppm (PMF); precursor/fragment mass accuracy, 50 ppm/0.3 Da (MS/MS). Unassigned MS/MS data were manually interpreted to create sequence tags for basic local alignment search tool (BLAST) searches on NCBI. Therefore, the most intense types of fragment ions, the N-terminal b-ions, C-terminal y-ions, and immonium ions, were used (5). Theoretical trypsin proteolysis of identified proteins and the subsequent visualization of the results were performed with Biotools v2.2 (Bruker Daltonics), which was also used to predict the peptide fragmentation patterns in MS/MS spectra.

**LILBID-MS.** LILBID-MS was performed as described previously (6). A user-written lab view program was used for data acquisition and analysis. The signal-to-noise ratio was improved by subtracting an unstructured background, caused by metastable loss of water and buffer molecules, from the original ion spectra. These different spectra were smoothed by averaging the signal over a preset number of channels of the transient recorder, with the smoothing interval always lying within the time resolution of the TOF mass spectrometer.

**EPR Spectroscopy.** X-band EPR spectra were obtained with a Bruker ESP 300E spectrometer equipped with an HP 53159A frequency counter (Hewlett Packard), ER 035 M NMR gaussmeter (Bruker, BioSpin) and a liquid helium continuous flow cryostat (Oxford Instruments). Spectra were recorded using the following parameters: microwave frequency 9.47 GHz, modulation amplitude 0.64 mT or 1 mT, modulation frequency 100 kHz. Samples were frozen in cold isopentane/methylcyclohexane (5:1, ~120 K) and stored in liquid nitrogen until measurement. Both Cox2 and supercomplex were recorded in the air-oxidized state without any further addition at a temperature of 10 K and microwave power of 10 mW.

**Activity Assay.** Cytochrome *c* oxidation/reduction and quinol oxidation were recorded with an Agilent 8453 UV-visible spectrometer at 80 °C. Horse heart cytochrome *c* (Sigma) was reduced by sodium dithionite and excess dithionite was removed by a PD10 column (GE Healthcare). Decylubiquinone (Fluka) was reduced by sodium dithionite on an Extrelut N1 column (7). The reduced cytochrome *c* and decylubiquinol were stored at -80 °C and ready to use. The reaction buffer was composed of 30 mM potassium phosphate (pH 7.0) and 0.02 mg/mL of the target enzyme. Cytochrome *c* oxidation measurements were started by injecting 56  $\mu$ M reduced cytochrome *c* into the reaction buffer. Cytochrome *c* reduction was measured by applying 45  $\mu$ M decylubiquinol into the reaction buffer containing 60  $\mu$ M air oxidized horse heart cytochrome *c* and 1 mM potassium cyanide. Decylubiquinol oxidation was measured by adding 45  $\mu$ M decylubiquinol into reaction buffer. The initial linear absorption changes of cytochrome *c* [ $\Delta\epsilon_{\text{red-ox},550\text{ nm}-540\text{ nm}} = 19\text{ mM}^{-1}\text{ cm}^{-1}$  (8)] and ubiquinol [ $\Delta\epsilon_{\text{ox-red},275\text{ nm}} = 12.5\text{ mM}^{-1}\text{ cm}^{-1}$  (9)] were used for calculating specific activities.

Decylubiquinol titration measurements were started by injecting varying amounts of decylubiquinol into the reaction buffer, optionally containing 60  $\mu$ M horse heart cytochrome *c*, +/- 1 mM potassium cyanide.

Oxygen consumption in the presence of decylubiquinol/DTT was recorded using a Hansatech Oxygraph oxygen electrode at 40 °C as described in ref. 10. DTT, potassium cyanide, and stigmatellin were purchased from Sigma. The reaction was started by injecting 50  $\mu$ L enzyme into 450  $\mu$ L buffer containing 30 mM potassium phosphate buffer (pH 7.0), 0.05% DDM, 1 mg/mL asolectin, 125  $\mu$ M decylubiquinol, and 5 mM DTT (final concentrations). One millimolar potassium cyanide, 40  $\mu$ M stigmatellin, and 60  $\mu$ M air-oxidized horse heart cytochrome *c* were applied if desired.

- Peng G, et al. (2003) Isolation, characterization, and electron microscopic single particle analysis of the NADH: ubiquinone oxidoreductase (complex I) from the hyperthermophilic eubacterium *Aquifex aeolicus*. *Biochemistry* 42:3032-3039.
- Shevchenko A, Tomas H, Havlis J, Olsen JV, Mann M (2006) In-gel digestion for mass spectrometric characterization of proteins and proteomes. *Nat Protoc* 1:2856-2860.
- Galkin A, et al. (2008) Identification of the mitochondrial ND3 subunit as a structural component involved in the active/deactive enzyme transition of respiratory complex I. *J Biol Chem* 283:20907-20913.
- Perkins DN, Pappin DJ, Creasy DM, Cottrell JS (1999) Probability-based protein identification by searching sequence databases using mass spectrometry data. *Electrophoresis* 20:3551-3567.
- Roepstorff P, Fohlman J (1984) Proposal for a common nomenclature for sequence ions in mass spectra of peptides. *Biomed Mass Spectrom* 11:601.
- Morgner N, Barth H-D, Brutschy B (2006) A new way to detect noncovalently bonded complexes of biomolecules from liquid micro-droplets by laser mass spectrometry. *Aust J Chem* 59:109-114.
- Palsdottir H, Hunte C (2003) Determination of cytochrome bc1 complex activity. *Membrane Protein Purification and Crystallization: A Practical Guide*, ed Hunte C, Von Jagow G, Schagger H (Academic, San Diego), 2nd Ed, pp 197-198.
- Ouchane S, Agalidis I, Astier C (2002) Natural resistance to inhibitors of the ubiquinol cytochrome *c* oxidoreductase of *Rubrivivax gelatinosus*: Sequence and functional analysis of the cytochrome bc(1) complex. *J Bacteriol* 184:3815-3822.
- Zickermann I, et al. (1996) Biochemical and spectroscopic properties of the four-subunit quinol oxidase (cytochrome ba3) from *Paracoccus denitrificans*. *Biochim Biophys Acta* 1277:93-102.
- Abramson J, et al. (2000) The structure of the ubiquinol oxidase from *Escherichia coli* and its ubiquinone binding site. *Nat Struct Biol* 7:910-917.

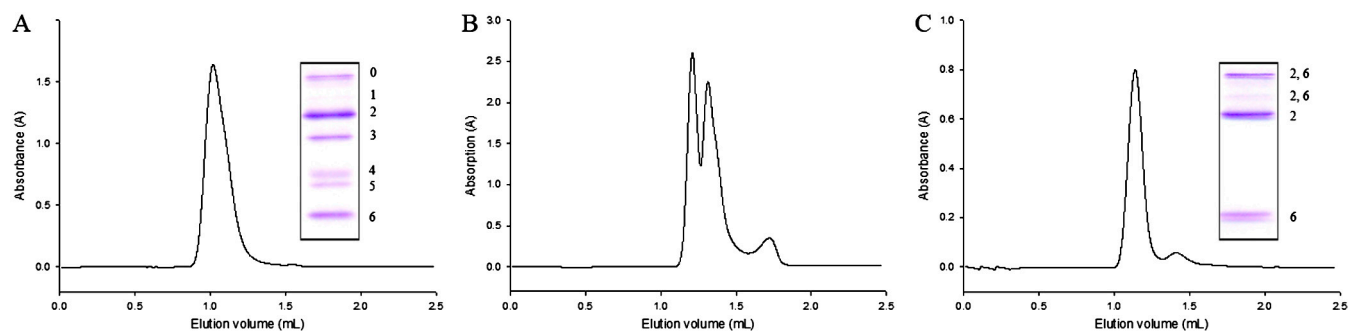

**Fig. S1.** Size exclusion chromatograms and subunit identification by MALDI-MS of SDS-PAGE bands. (A) Supercomplex; (B) supercomplex dissociation in detergent OG; and (C) Cox2. The single peaks were eluted from a Superdex 200 column (GE Healthcare) in a SMART system (GE Healthcare). Protein elution was monitored by the absorption at 280 nm. Numbers next to the protein bands in SDS-PAGE (stained by Coomassie blue) refer to the following subunits: 1, outer membrane protein C (OprC); 2, Cox2 subunit I (CoxA2); 3, cytochrome *b* (PetB); 4, cytochrome *c*<sub>1</sub> (Cyc); 5, Rieske protein (PetA); 6, Cox2 subunit II (CoxB2). The band 0 in A provides mixed MS peaks which can be assigned to the cytochrome *bc*<sub>1</sub> complex, Cox2, and the outer membrane protein C.

**A**  
Gene: *coxA2*; 66.4 kDa

>gi|15607124|ref|NP\_214506.1| cytochrome *c* oxidase subunit I [Aquifex aeolicus VF5]

**MWV**MQVSNAIKFIILTEIFPTLLLVFGIYHGMQVYFRSGHKAESFLGIDYQGLTLHGVINVIVYTFIVGFNSNAIVAYSLKKPLREKVVQWIALGMMVIGTLMAAWAMFTGRATVLYTFYFPLIAHWTFYLGAVLLVGLSLVFFFDWIPSAIQWKRENPDQGLPLAVFGTFVNFILWTIMIVPAVIEILFQLLPLSLGLVDEINPLLARTLFWFGHVVVFWLLPAYVALYTLPKIVSEKGLKLYSDPAARLAFILFLFSLPVLGHQFDPGINTWKLHIALFTFVGLALPSMIFATVATSLEYSVKAHEHPELKNKSFYWWTFPFMRLEGNKWMFSYFFAGLVLFVIGGITGVNASYNVNLVHNTAYVPGHFTTVGGLVLLVFFALSLYMVKSLRGSEVKLGLAVLAPYFWMQGMFMFSYAMMVGGVVVGFPRRTNAGLTYLNPDSPLYRPEWGYAQLAAVGGVLLAIGFAFYFASLIATLAPKVRSTLEFPIADAYHDAPAPLLNNLKTWTVAAHLAVLSYIPPLYDASVRGVFKSPAYNEKFPMLKQLQGA**EKKEEKELSKAEGGITQK**

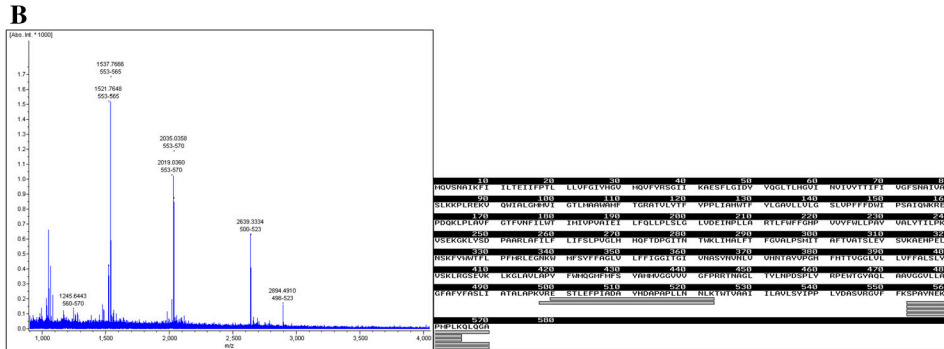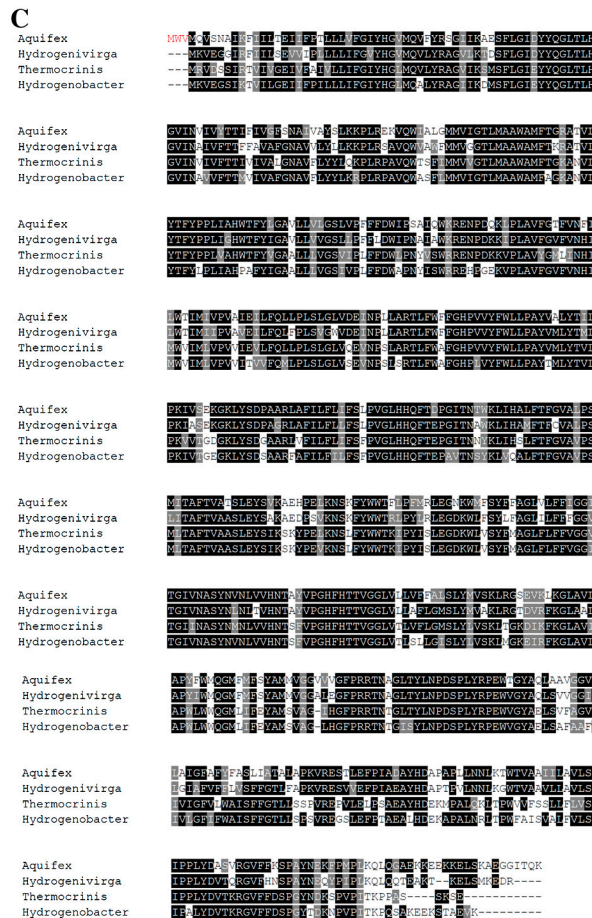

**Fig. S2.** Identification of sequence truncations in Cox2 subunit I (CoxA2). (A) CoxA2 has a calculated molecular mass of 66.4 kDa according to the database sequence. The shortened C- and N-termini are shown in red. The calculated mass of the shortened sequence fits to the Cox2 subunit I mass identified by LILBID-MS (Fig. S5). (B) Representative MS-spectrum of Cox2 subunit I showing the unambiguously verified C-terminal truncation. The detected signals at 1,245, 2,019, and 2,035 can only be generated by trypsin using the shortened sequence in A. (C) Sequence alignment of CoxA2 and three selected cytochrome *c* oxidase subunit I. The blast result supports the lack of three amino acids at N terminus. The selected sequences are *Hydrogenivirga specie* 128-5-R1-1 (accession no. ZP\_02176550), *Thermocrinis albus* DSM 14484 (accession no. YP\_003474330), and *Hydrogenobacter thermophilus* TK-6 (accession no. YP\_003433137).

**A** 5'3' Frame 2

```

tttctcctcttccctcctctatattttttattgaaaaaataaactttttgatcac
F S S F L P L Y F F I - K N - L L F D H
aaaatcacttttatcttaatttgagctaaaacataaaacaaagaacatattgatttc
K I T F I L N L S - N I K Q R N I L I F
aattagtttaactctgcagtaagtttagtattactgacaattacaagtttgaggtgaaa
N - F N L V S K L V L L D N Y K F E V K
aattaattatgtagctcataaaaactcgtgaggaggtgtgaaaaatgaatgaaaagcatg
N - L C S S - K L V R R C E K - M K S M
aacatgaggaattttcccgctcgggtacaatagcatttttatcttcgatggctctttt
N M R N F S R R V Q - H F L S S - W S F
atgcggtctctcgggtcattgattactgggttctactgaaaggggtaaggagagatgg
M R F S G S - F T G F Y L K G G K E R W
acagggctgaaaaaacaggactaacttttagcttaataactctcttaccctcttttagct
T G L K K Q D - L - L - Y F C L P S L A
frame shift
tgatcgtttacgctcaaaaggactcaagatagacattccccacggtgtaacggacgta
- S F T L Q R D S R - T F P E C V T D V
II.4III. I.
gaacctccaggaaggaaactcattaacacggggacaagaggtacgaactccacata
E P F Q E G K L I K H G D K R Y E L H I
I.
ctgcaaggatgtggtactttgatttcaacaaaggtgctaccgaaataaagataccgta
L A R M W Y F D F N K G A T E I K I F V
ggttccgtatggacatattcagcactcaaaaggtatggttccgggtacatattcat
G S V V D I F T T S K D V V H G V H I H
ggaaccaattacaagtaatggcaattcccgaactgttggttacatgaggataaagttt
G T N Y N V M A I F G T V G Y M R I K F
gaaaaacccggagtttaccacgttgggtccacaggttctgcggtgttggtcaccatgct
E K F G V Y H V V C H E F C G V G H H A
atgcaaggaaaaataatcgttgaataa
M Q G K I I V E -

```

**B** 5'3' Frame 1

```

tttctcctcttccctcctctatattttttattgaaaaaataaactttttgatca
F L L F P S S I F F Y L K K L I T F - S
caaaatcacttttatcttaatttgagctaaaacataaaacaaagaacatattgatttc
Q N H F Y L K F E L K H K T K K H I D F
caattagtttaactctgcagtaagtttagtattactgacaattacaagtttgaggtgaa
Q L V - S C Q - V S I T - Q L Q V - G E
aaattaattatgtagctcataaaaactcgtgaggaggtgtgaaaaatgaatgaaaagcat
K L I M - L I K T R E E V - K M N E K H
gaacatgaggaattttcccgctcgggtacaatagcatttttatcttcgatggctcttt
E H E E F F P S G T I A F F I F M M V F
Start
tatgcggtctctcgggtcattgattactgggttctactgaaaggggtaaggagagatg
Y A V L W F M I Y W V L L E R G - G E M
gacagggctgaaaaaacaggactaacttttagcttaataactctctgcttaccctctttagc
D R A E K T G L T L A L I L L L T F F S
III. II. frame shift
ttgatcgtttacgctcaaaaggactcaagatagacattccccacggtgtaacggacgt
L I V Y A A K E L K I D I H H V C N G R
agaaccctccaggaaggaaactcattaacacggggacaagaggtacgaactccacat
R T L P G R E T H - T R G Q E V R T P H
actgcgaaggtatggtactttgatttcaacaaaggtgctaccgaaataaagataccggt
T R K D V V L - F Q Q R C Y R N K D T R
aggttccgtatggacatattcagcactcaaaaggtatggttccgggtacatattca
R F R S G H I H D F K G C S S R C T Y S
tggaaccaattacaagtaatggcaattcccgaactgttggttacatgaggataaagtt
W N Q L Q R N G N S R N C W L H E D K V
tgaaaaacccggagtttaccacgttgggtccacaggttctgcggtgttggtcaccatgc
- K T R S L P R C L P R V L R C W S P C
tatgcaaggaaaaataatcgttgaataa
Y A R K N N R - I

```

**C**

```

Start
atg
M
gacagggctgaaaaaacaggactaacttttagcttaataactctctgcttaccctctttagc
D R A E K T G L T L A L I L L L T F F S
III. II. frame shift
ttgatcgtttacgctcaaaaggactcaagatagacattccccacggtgtaacggacgta
L I V Y A A K E L K I D I H H G V T D V
II.4III. I.
gaacctccaggaaggaaactcattaacacggggacaagaggtacgaactccacata
E P F Q E G K L I K H G D K R Y E L H I
I.
ctgcaaggatgtggtactttgatttcaacaaaggtgctaccgaaataaagataccgta
L A R M W Y F D F N K G A T E I K I F V
ggttccgtatggacatattcagcactcaaaaggtatggttccgggtacatattcat
G S V V D I F T T S K D V V H G V H I H
ggaaccaattacaagtaatggcaattcccgaactgttggttacatgaggataaagttt
G T N Y N V M A I F G T V G Y M R I K F
gaaaaacccggagtttaccacgttgggtccacaggttctgcggtgttggtcaccatgct
E K F G V Y H V V C H E F C G V G H H A
atgcaaggaaaaataatcgttgaataa
M Q G K I I V E -

```

**Fig. S3.** Correction of the annotated Cox2 subunit II (CoxB2) based on MALDI-MS data. The six frame translation was performed with the program Translate (1). The two relevant translation frames are depicted in A and B. The discovered frameshift is indicated and the real N-terminal extension is colored in red. The sequences printed in red mark the MS/MS verified regions (see Fig. 1) which showed the presence of the N-terminal extension (I) and the frameshift (II and III). The incorrectly annotated CoxB2 sequence is shown in green in A and C. (C) The corrected *coxB2* sequence.

1 Gasteiger E, et al. (2003) ExPASy: The proteomics server for in-depth protein knowledge and analysis. *Nucleic Acids Res* 31:3784-3788.

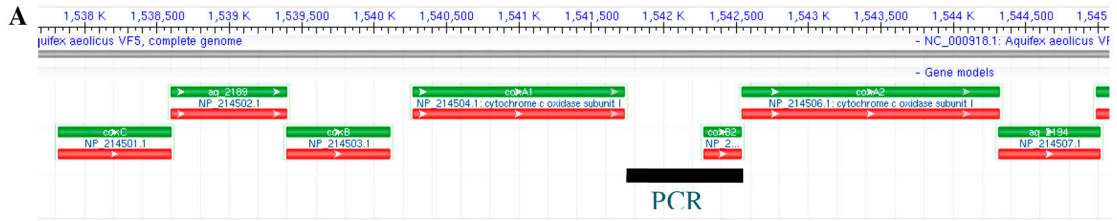

**B**

|             |     |                                                                |     |
|-------------|-----|----------------------------------------------------------------|-----|
| Genomic DNA | 1   | -----TTTCTCCTCTTTCTCCTCTATATTTTTTTTATTT                        | 35  |
| PCR product | 61  | ATTCAGTCTAGTATTCGCGGATCCTGTTTCTCCTCTTTCTCCTCTATATTTTTTTTATTT   | 120 |
| Genomic DNA | 36  | GAAAAAATTAATTACTTTTTGATCACAAAATCACTTTTATCTTAAATTTGAGCTAAAAACA  | 95  |
| PCR product | 121 | GAAAAAATTAATTACTTTTTGATCACAAAATCACTTTTATCTTAAATTTGAGCTAAAAACA  | 180 |
| Genomic DNA | 96  | TAAAACAAAGAAACATATTGATTTTCAATTAGTTTAACTTGTGTCAGTAAAGTTAGTATTAC | 155 |
| PCR product | 181 | TAAAACAAAGAAACATATTGATTTTCAATTAGTTTAACTTGTGTCAGTAAAGTTAGTATTAC | 240 |
| Genomic DNA | 156 | TTGACAATTACAAGTTTGGAGTAAAAATTAATTATGTAGCTCATAAAAACCTCGTGAGGA   | 215 |
| PCR product | 241 | TTGACAATTACAAGTTTGGAGTAAAAATTAATTATGTAGCTCATAAAAACCTCGTGAGGA   | 300 |
| Genomic DNA | 216 | GGTGTGAAAAATGAATGAAAAGCATGAACATGAGGAATTTTTCCCGTCGGGTACAATAGC   | 275 |
| PCR product | 301 | GGTGTGAAAAATGAATGAAAAGCATGAACATGAGGAATTTTTCCCGTCGGGTACAATAGC   | 360 |
| Genomic DNA | 276 | ATTTTTTATCTTCATGATGGTCTTTTATGCGGTTCTCTGGTTCATGATTACTGGGTTCT    | 335 |
| PCR product | 361 | ATTTTTTATCTTCATGATGGTCTTTTATGCGGTTCTCTGGTTCATGATTACTGGGTTCT    | 420 |
| Genomic DNA | 336 | ACTTGAAAGGGGGTAAGGAGAGATGGACAGGGCTGAAAAACAGGACTAACTTTAGCTTT    | 395 |
| PCR product | 421 | ACTTGAAAGGGGGTAAGGAGAGATGGACAGGGCTGAAAAACAGGACTAACTTTAGCTTT    | 480 |
| Genomic DNA | 396 | AATACTTCTGCTTACCTTCTTTAGCTTGATCGTTTACGCTGCAAAGGGACTCAAGATAGA   | 455 |
| PCR product | 481 | AATACTTCTGCTTACCTTCTTTAGCTTGATCGTTTACGCTGCAAAGGGACTCAAGATAGA   | 540 |
| Genomic DNA | 456 | CATTCCCACGTGTGTAACGGACGTAGAACCCCTCCAGGAAGGAAACTCATTAAACACG     | 515 |
| PCR product | 541 | CATTCCCACGTGTGTAACGGACGTAGAACCCCTCCAGGAAGGAAACTCATTAAACACG     | 599 |
| Genomic DNA | 516 | GGGACAAGAGGTACGAACCTCCACATACTCGCAAGGATGTGGTACTTTGATTTCACAAAG   | 575 |
| PCR product | 600 | GGGACAAGAGGTACGAACCTCCACATACTCGCAAGGATGTGGTACTTTGATTTCACAAAG   | 659 |
| Genomic DNA | 576 | GTGCTACCGAAATAAAGATACCCGTAGGTTCCGTTAGTGGACATATTCACGACTTCAAAGG  | 635 |
| PCR product | 660 | GTGCTACCGAAATAAAGATACCCGTAGGTTCCGTTAGTGGACATATTCACGACTTCAAAGG  | 719 |
| Genomic DNA | 636 | ATGTAGTTCACGGTGTACATATTCATGGAACCAATTACAACGTAATGGCAATTCACCGAA   | 695 |
| PCR product | 720 | ATGTAGTTCACGGTGTACATATTCATGGAACCAATTACAACGTAATGGCAATTCACCGAA   | 779 |
| Genomic DNA | 696 | CTGTTGGTTACATGAGGATAAAGTTTGAAAAACCCGGAGTTTACCACGTTGTTTGCCACG   | 755 |
| PCR product | 780 | CTGTTGGTTACATGAGGATAAAGTTTGAAAAACCCGGAGTTTACCACGTTGTTTGCCACG   | 839 |
| Genomic DNA | 756 | AGTCTGCGGTGTTGGTACCATTGCTATGCAAGGAAAAATAATCGTTGAATAA-----      | 808 |
| PCR product | 840 | AGTCTGCGGTGTTGGTACCATTGCTATGCAAGGAAAAATAATCGTTGAATAAACAAGT     | 899 |

**Fig. S4.** DNA sequence of the *coxB2* gene. To confirm the sequence error in *CoxB2*, PCR was used to generate an 808 bp DNA fragment from position 1541728 to 1542535 using the oligonucleotide pairs

5'CGCGGATCCTGTTTCTCCTCTTTCTCCTCTATATTT3' and 5'CCGGAATTCGTTTATTCACGATTATTTTCTTGC3'.

The incorrectly annotated *coxB2* gene consists of 258 bp from 1542278 to 1542535. The pGEM-T easy vector (Promega) was used for ligation and positive clones were selected using the restriction enzyme BstZI (Promega). The isolated plasmid was sequenced by Eurofins MWG. (A) A scheme of the PCR amplified region in *A. aeolicus* genome; (B) alignment of the PCR product and the genomic DNA. The expected frameshift according to MALDI-MS (Fig. S3) was detected at position 1542187. The genomic DNA encodes an additional cysteine C (marked in red in B).





```

P.denitrificans 1 QDVLGDLPLVIGKPVNGGMNFQPASSPLAHDQQWLDHFVLYIITAVTIFVCLLLLICIVRF 60
A.aeolicus -----
P.denitrificans 61 NRRANVPARFTHNTPIEVIWTLVPLILVAIGAFSLPILFRSQEMPNDPLVIKATGHQ 120
++ L L+ + F I++ ++ + D + ++ +
A.aeolicus 1 -----MDRAEKTGLTLALILLTFFSLIVYAAKGLKIDIPTCVTVW--E 42
P.denitrificans 121 WYWSYIYPNDGVAFDALMLEKEALADAGYSEDEYLLATDNPVVVPGKVKLVQVTATDVI 180
++ + + G E LA Y D AT+ + +PVG V + T+ DV+
A.aeolicus 43 HFQEGKLIKHG---DKRYELHILARMWYF-DFNKGATE--IKIPVGSVVDIFTTSDIVV 95
P.denitrificans 181 LAWTIPAPAVKQDAVPGRIAQLWFSVDQEGVYFGCSLGLGINAYN--PIVVKAVSQEK 238
I A+PG + + ++ GVY C C G+ H H X
A.aeolicus 96 LGVHIHGTNYNVMAIPGTVGVMRIKFEKPGVYHVVCHFFCGVGHAMQGKIIVE----- 149
P.denitrificans 239 YEAWLAGAKEEFAA 252
A.aeolicus -----

```

**Fig. S9.** Sequence alignment of *A. aeolicus* Cox2 subunit II and *Paracoccus denitrificans* cytochrome *aa*<sub>3</sub> oxidase subunit II. All residues coordinated with Cu<sub>A</sub> center are conserved in *A. aeolicus* Cox2 (highlighted in green colors in red box). Most residues belong to the potential cytochrome c binding site are conserved in *A. aeolicus* Cox2 (highlighted in blue colors in black box), which supports the possibility of horse heart cytochrome c binding. The selected sequences are: *P. denitrificans* subunit II (accession no. 1QLE\_B) and *A. aeolicus* subunit II (CoxB2, accession no. JN655694). The alignment was done by Geneious Basic 4.8.5 noncommercial license (1).

1 Drummond AJ, et al. (2011) Geneious v5.4, Available at <http://www.geneious.com>.

**Table S1. Subunit identification by MALDI-MS**

| Protein sample                  | Identified subunits              | Genes        | Protein score | Precursor mass | Identified peptide sequence | Ions score |
|---------------------------------|----------------------------------|--------------|---------------|----------------|-----------------------------|------------|
| Supercomplex                    | Outer membrane protein c         | <i>oprC</i>  | 94            | —              | —                           | —          |
|                                 | Cytochrome c oxidase subunit I   | <i>coxA2</i> | 22            | 1537.7613      | SPAYNEKFPMPK + Ox           | 74         |
|                                 | —                                | —            | —             | 2639.3226      | ESTLEFPIADAYHDAPAPLLNNLK    | 85         |
|                                 | Cytochrome <i>b</i>              | <i>petB</i>  | 96            | —              | —                           | —          |
|                                 | Cytochrome <i>c</i> <sub>1</sub> | <i>Cyc</i>   | 132           | —              | —                           | —          |
|                                 | Rieske protein                   | <i>petA</i>  | 174           | —              | —                           | —          |
| Cox2                            | Cytochrome c oxidase subunit II  | <i>coxB2</i> | 46            | —              | —                           | —          |
|                                 | Cytochrome c oxidase subunit II  | <i>coxB2</i> | 60            | —              | —                           | —          |
|                                 | Cytochrome c oxidase subunit I   | <i>coxA2</i> | 14            | 1537.7664      | SPAYNEKFPMPK + Ox           | 87         |
|                                 | —                                | —            | —             | 2639.3435      | ESTLEFPIADAYHDAPAPLLNNLK    | 82         |
|                                 | Cytochrome c oxidase subunit I   | <i>coxA2</i> | 22            | 1537.7666      | SPAYNEKFPMPK + Ox           | 76         |
|                                 | —                                | —            | —             | 2639.3334      | ESTLEFPIADAYHDAPAPLLNNLK    | 90         |
| Cytochrome c oxidase subunit II | <i>coxB2</i>                     | 105          | —             | —              | —                           |            |

Protein scores greater than 44 are significant ( $p < 0.05$ ). Insignificant hits are verified with MS/MS experiments. Ions scores greater than 15 are significant ( $p < 0.05$ ). Ox, oxidized methionine.
